# Supplementary material for: A chemodosimetric chemosensor for the ratiometric detection of nerve agent-mimic DCP in solution and vapor phases
Source: Royal Society of Chemistry journal article supplement (doi:10.1039/d4ay00451e), 2024-04-05
Supplement: d4ay00451e1.pdf [file d4ay00451e1.pdf]

## **A Chemodosimetric Chemosensor for the Ratiometric Detection of Nerve Agent-Mimic DCP in Solution and Vapor Phase**

Shilpita Banerjee<sup>a</sup>, Pintu Ghosh<sup>a</sup>, Anirban Karak<sup>a</sup>, Dipanjan Banik<sup>a</sup>, Ajit Kumar Mahapatra<sup>a\*</sup>

*<sup>a</sup>Molecular Sensor and Supramolecular Chemistry Laboratory, Department of Chemistry,  
Indian Institute of Engineering Science and Technology, Shibpur,  
Howrah 711 103, India*

\*Author to whom correspondence should be addressed; electronic mail:  
[akmahapatra@chem.iiests.ac.in](mailto:akmahapatra@chem.iiests.ac.in); Tel.: +91 – 9434508013

\*Corresponding author. Fax: +91 33 26684564; Tel: +91 33 2668 4561;

E-mail: [mahapatra574@gmail.com](mailto:mahapatra574@gmail.com) (A. K. Mahapatra)

## Table of Contents

1. Comparison table of previously reported DCP sensors
2. Computational method
3. Calculation of LOD
4. pH effect
5. Calculation of first order rate constant
6. Emission spectra of aldehyde and probe
7. NMR and mass spectra of probe and product
8. Calculation of fluorescence quantum yield
9. References

**1. Table S1 Comparison between previously reported DCP sensors with the current work**

| Sl. No. | Probe structure                                                                     | Solvent            | Binding mechanism                                   | Response time | LOD                     | Application                   | Reference |
|---------|-------------------------------------------------------------------------------------|--------------------|-----------------------------------------------------|---------------|-------------------------|-------------------------------|-----------|
| 1.      | 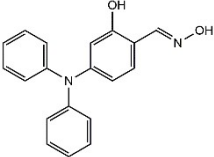   | CH <sub>3</sub> CN | Cyclization to benzisoxazole                        | <1 min        | 0.14 μM.                | Vapor phase, Live cells       | 1         |
| 2.      |    | DCM                | Phosphorylation at -NH                              | 300 s         | 5.5 nM                  | Vapor phase                   | 2         |
| 3.      |   | THF                | Phosphorylation at -NH                              | 40 s          | 8.45×10 <sup>-8</sup> M | Vapor phase                   | 3         |
| 4.      |  | CHCl <sub>3</sub>  | Phosphorylation at -NH                              | <2 min        | 8.45×10 <sup>-8</sup> M | Vapor phase                   | 4         |
| 5.      |  | DMF                | Phosphorylation followed by ring-opening            | 10 s          | 1.4 nM                  | Vapor phase                   | 5         |
| 6.      |  | CH <sub>3</sub> CN | Phosphorylation at -OH                              | 3 min         | 0.12 μM                 | -----                         | 6         |
| 7.      |  | THF                | hydrolysis of imine                                 | 2.5 min       | 3.56×10 <sup>-8</sup> M | Vapor phase, Live cells       | 7         |
| 8.      |  | DMSO               | Phosphorylation followed by hydrolysis of phosphate | 18 s          | 1.4 nM                  | Vapor phase-cotton biopolymer | 8         |
| 9.      |                                                                                     |                    |                                                     |               |                         |                               | 9         |

|     |                                                                                           |                    |                        |        |         |                                      |              |
|-----|-------------------------------------------------------------------------------------------|--------------------|------------------------|--------|---------|--------------------------------------|--------------|
|     | 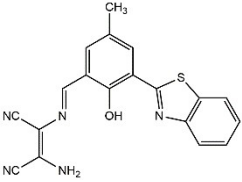         | CH <sub>3</sub> CN | deimination            | 28 min | 0.43 μM | Vapor phase,<br>Live cells           |              |
| 10. | <br>MNFZ | CH <sub>3</sub> CN | hydrolysis of<br>imine | 100 s  | 12.2 nM | Vapor phase-<br>cotton<br>biopolymer | This<br>work |

## 2. Computational method

### Theoretical calculations

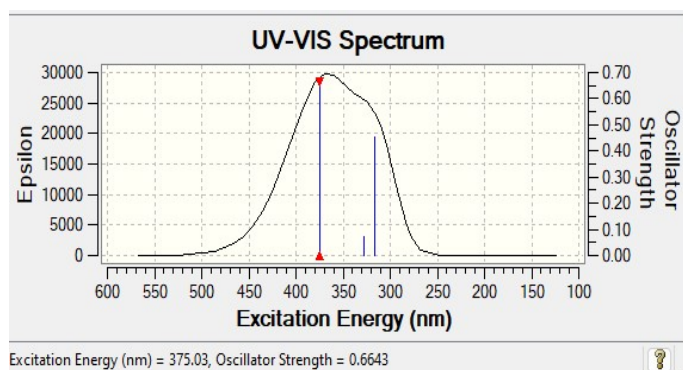

**Figure S1.** Absorption spectra of the Probe (MNFZ)

**Table S2** The vertical main orbital transition of the MNFZ calculated by TDDFT method

| Energy (eV) | Wavelength (nm) | Osc. Strength (f) | Transition             |
|-------------|-----------------|-------------------|------------------------|
| 3.3060      | 375.03          | 0.6643            | <b>HOMO → LUMO</b>     |
| 3.7844      | 327.62          | 0.0705            | <b>HOMO → LUMO + 1</b> |
| 3.9244      | 315.94          | 0.4531            | <b>HOMO-1 → LUMO</b>   |

### 3. Calculation of Limit of detection

From the plot of fluorescence intensity ratio  $I_{528}/I_{434}$  vs concentration of DCP limit of detection was calculated by using the formula  $LOD = k \times \delta / m$  where  $k = 3$ ,  $\delta$  is the standard deviation of the intensity ratio ( $I_{434}/I_{527}$ ) of blank solution (0.008163) and  $m$  is the slope of the calibration curve ( $2.00 \times 10^6$ ).

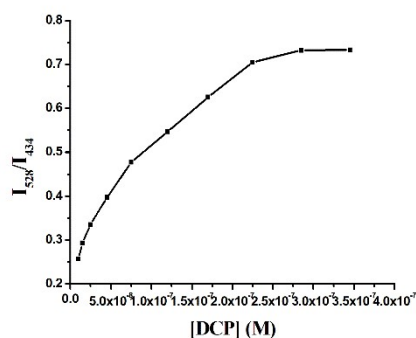

Figure S2. Plot of fluorescence intensity ratio vs concentration of DCP

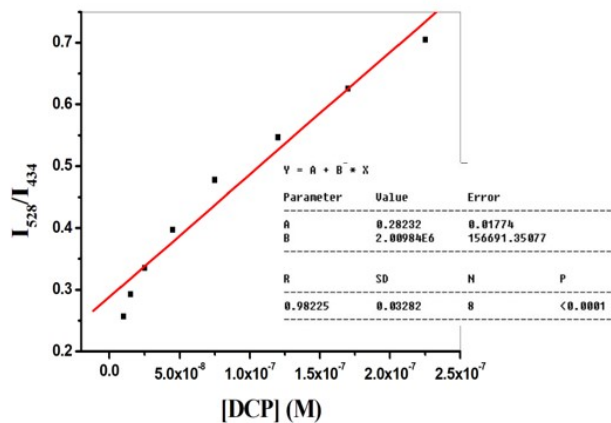

Figure S3. Calibration of the probe at an intensity ratio  $I_{528}/I_{434}$  depending on DCP concentration.

LOD = 12.2 nM ( $R^2 = 0.98225$ )

#### 4. pH effect

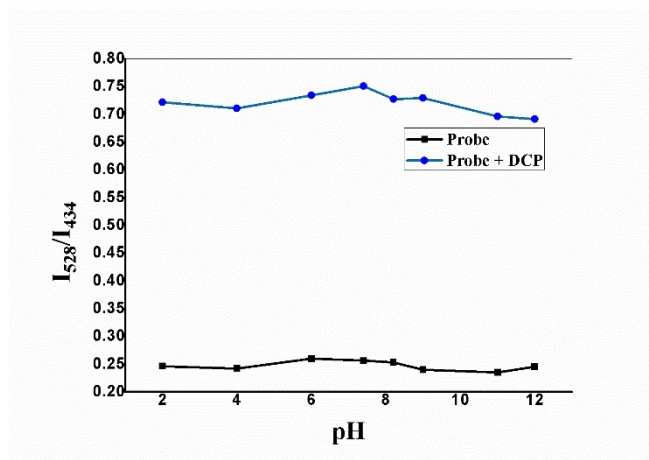

**Figure S4.** Variation of fluorescence intensity ratio ( $I_{528}/I_{434}$ ) of MNFZ with the change in pH in ACN/H<sub>2</sub>O (9:1 v/v) solution ( $\lambda_{ex}=335$  nm).

#### 5. Calculation of first order rate constant (k)

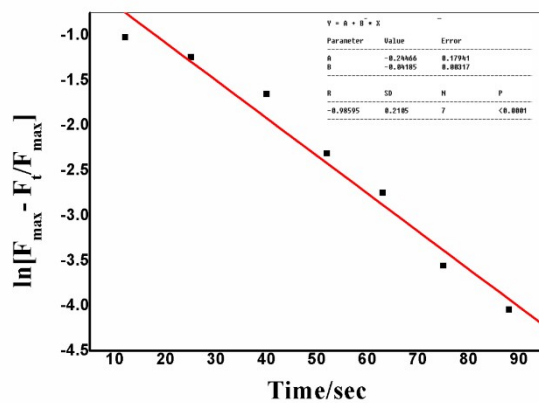

**Figure S5.** First order kinetic plot of probe ( $1 \times 10^{-5}$  M) in the presence of  $1 \times 10^{-4}$  M DCP solution ( $\lambda_{ex}=335$  nm)

First order rate constant  $k = 0.04185 \text{ s}^{-1}$

## 6. Emission spectra of aldehyde (MNPA) and probe (MNFZ)

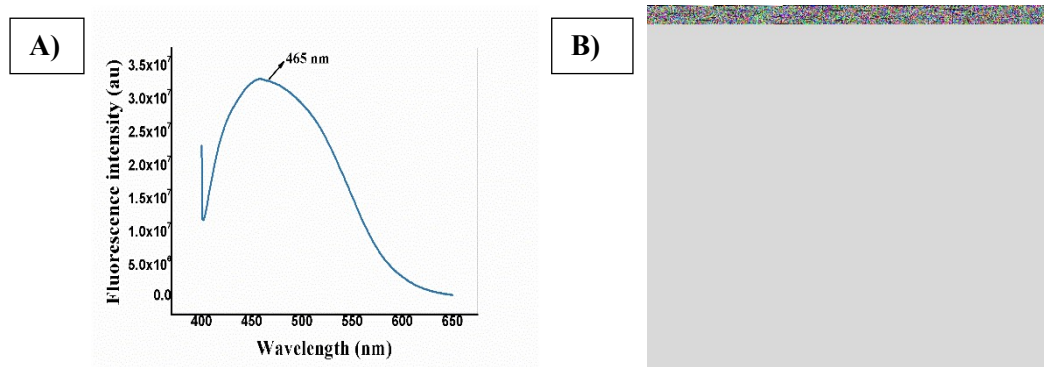

**Figure S6.** A) Emission spectra of MNPA ( $1 \times 10^{-5} \text{M}$ ) in ACN-water (9:1 v/v). B) Fluorescence intensity changes of MNFZ ( $1 \times 10^{-5} \text{M}$ ) upon gradual addition of DCP in ACN-water (9:1 v/v) ( $\lambda_{\text{ex}}=335 \text{ nm}$ ).

## 7. NMR spectra: <sup>1</sup>H-NMR, <sup>13</sup>C-NMR

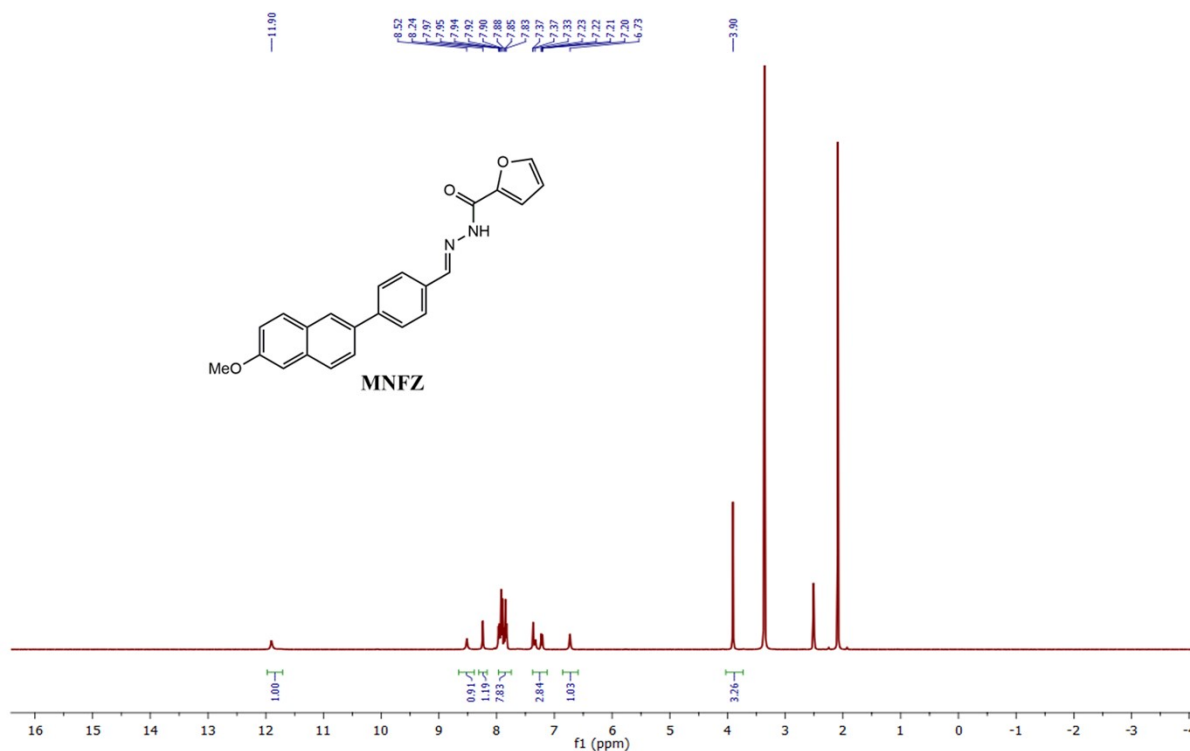

**Figure S7:** <sup>1</sup>H-NMR spectra of MNFZ in DMSO-d<sub>6</sub>

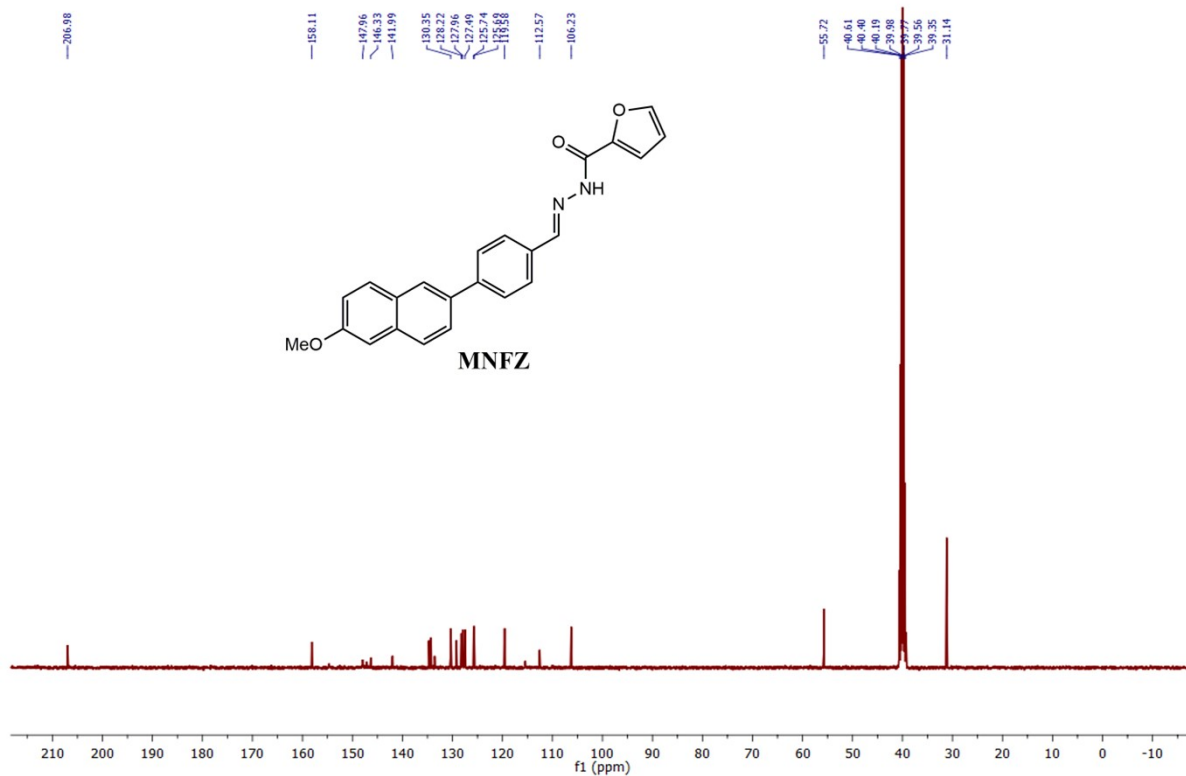

Figure S8 :  $^{13}\text{C-NMR}$  spectra of MNFZ in  $\text{DMSO-d}_6$

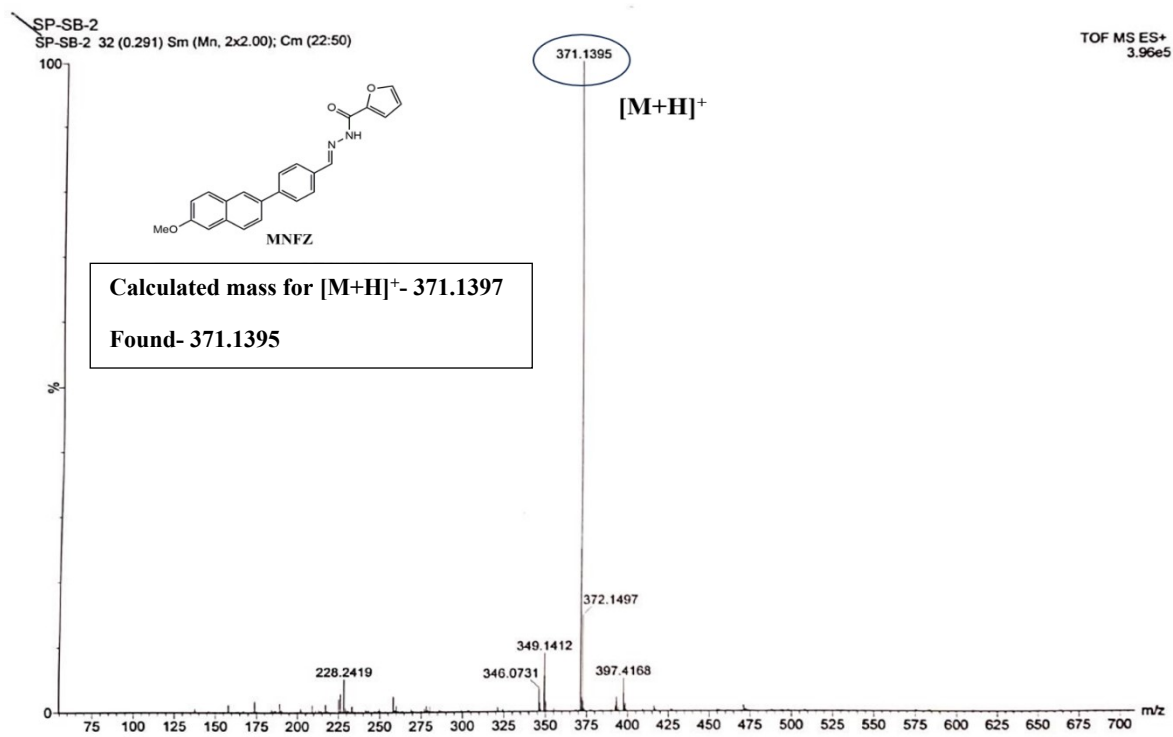

Figure S9: ESI-MS of probe MNFZ



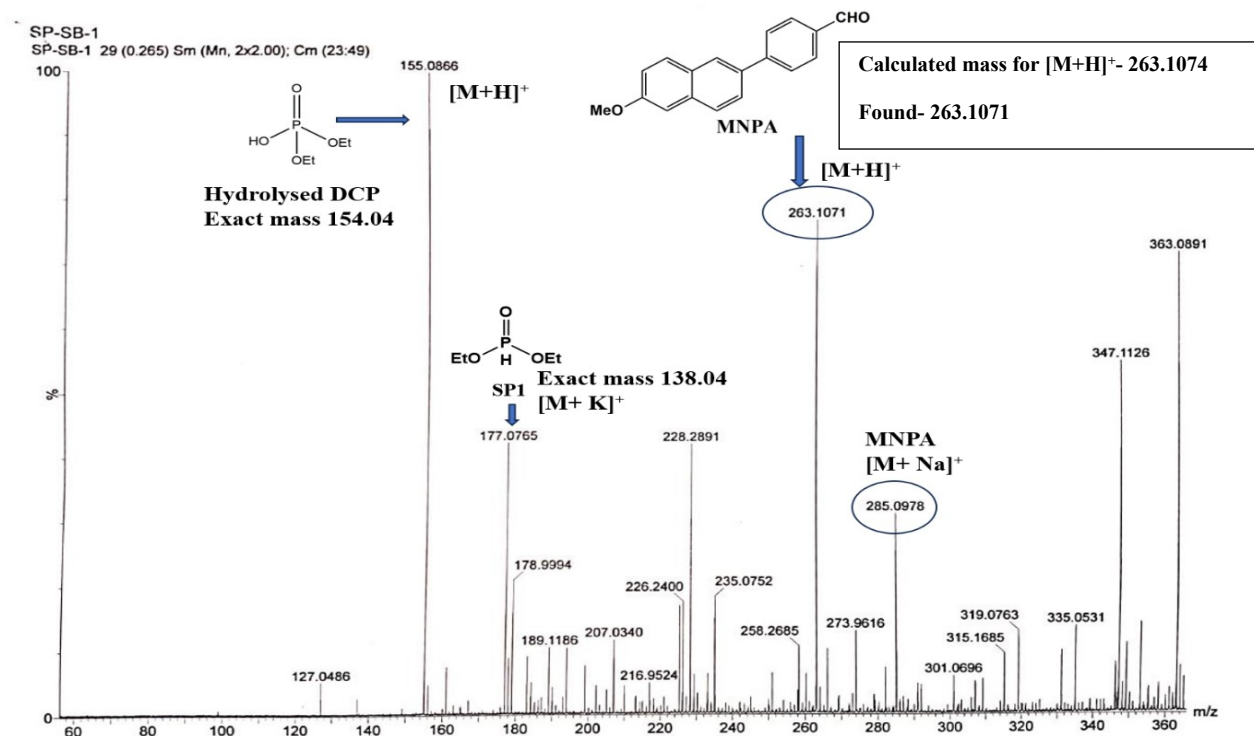

**Figure S10: ESI-MS of product MNPA**

## 8. Calculation of fluorescence quantum yield

The fluorescence quantum yield is calculated by the following equation:

$$\Phi_x = \Phi_s \times (F_x/F_s) \times (A_s/A_x) \times (\eta_x^2/\eta_s^2)$$

Where  $\Phi$  = quantum yield ( $\Phi_s=0.27$ )

$F_x$  [ $3.05 \times 10^9$  (MNFZ) and  $3.34 \times 10^9$  (MNPA)] and  $F_s$  ( $4.45 \times 10^8$ ) are the integrated fluorescence intensity of MNFZ, MNPA and fluorescein (reference) respectively.

$A_x$  (0.5 for MNFZ and 0.43 for MNPA) and  $A_s$  (0.08) are the absorbance of the MNFZ, MNPA and fluorescein (reference) respectively at the excitation wavelength.

$\eta_x$  (1.34) and  $\eta_s$  (1.36) are the refractive indices of respective solvents employed as Acetonitrile and Ethanol.

So, quantum yield for MNFZ = 0.2874 (28.74 %) and quantum yield for MNPA = 0.3660 (36.60%)

## 9. References:

1. S. S. Ali, A. Gangopadhyay, A. K. Pramanik, U. N. Guria, S. K. Samanta, and A. K. Mahapatra, *Dyes and Pigments*, 2019, **170**, 107585.
2. H. Xu, H. Zhang, L. Zhao, C. Peng, G. Liu, and T. Cheng, *New Journal of Chemistry*, 2020, **44**, 10713-10718.
3. K. Aich, S. Das, S. Gharami, L. Patra, and T.K. Mondal, *New Journal of Chemistry*, 2017, **41**, 12562-12568.
4. S. Gharami, K. Aich, S. Das, L. Patra, and T.K. Mondal, *New Journal of Chemistry*, 2019, **43**, 8627-8633.
5. S. Zhang, C. Zhou, B. Yang, Y. Zhao, L. Wang, B. Yuan, and H. Li, *New Journal of Chemistry*, 2021, **45**, 7564-7570.
6. D. Li, L. Zong, D. Li, S. Sui, Y. Xiao, B. Zhuang, Y. Shen, Z. Huang, and W. Wu, *Journal of Materials Chemistry C*, 2023, **11**, 4025-4032.
7. M. Mandal, U.N. Guria, S. Halder, A. Karak, D. Banik, K. Jana, A. Kar, and A.K. Mahapatra, *Organic & Biomolecular Chemistry*, 2022, **20**, 4803-4814.
8. A. Karak, S. Banerjee, S. Halder, M. Mandal, D. Banik, A. Maiti, K. Jana, and A.K. Mahapatra, *New Journal of Chemistry*, 2023, **47**, 16756-16763.
9. M. K. Das, T. Mishra, S. Guria, D. Das, J. Sadhukhan, S. Sarker, K. Dutta, A. Adhikary, D. Chattopadhyay, and S.S. Adhikari, *New Journal of Chemistry*, 2023, **47**, 250-257.
